# Supplementary material
Source: PubMed Central journal article supplement (PMC5733579)
Supplement: 10.1074_M117.806018_jbc.M117.806018-1.pdf [file 10.1074_M117.806018_jbc.M117.806018-1.pdf]

**Supplemental Data**

**The C-terminal region of A-kinase anchor protein 350 (AKAP350A) enables formation of microtubule-nucleation centers and interacts with pericentriolar proteins**

Elena Kolobova, Joseph T. Roland, Lynne A. Lapierre, Janice A. Williams, Twila A. Mason and James R. Goldenring

**List of Material included:**

Table S1

Figure S1

Figure S2

Figure S3

Figure S4

Figure S5

Figure S6

Fig.5video1.

Fig.5video2.

| Truncation of AKAP350A                    | Vector     | Restriction sites | Primers: S/AS                                                                               |
|-------------------------------------------|------------|-------------------|---------------------------------------------------------------------------------------------|
| F2F3Δ1<br>(1882-3907)                     | pEGFP-C1   | HindIII/BamHI     | gagc AAGCTTcgAGCTTCCGGCAGAAGCAGGAAGCCAC<br>gagcggatccTCATCTCCGCATGCCGGCGTGGA                |
| F2F3Δ2<br>(2182-3907)                     | pEGFP-C1   | HindIII/BamHI     | gagcAAGCTTcgAAGCCCgAACTGAGCCTGGAAGTGCAG<br>gagcggatccTCATCTCCGCATGCCGGCGTGGA                |
| F2F3Δ3<br>(2482-3907)                     | pEGFP-C1   | HindIII/BamHI     | gagcAAGCTTcgTACTTCAAGTCCTTTCGAAGAGAACGGCAAGGGCA<br>gagcggatccTCATCTCCGCATGCCGGCGTGGA        |
| F3Δ1<br>(2762-3907)                       | pEGFP-C3   | XhoI/BamHI        | gagcCTCGAGAAAAAGGCCTGCATGTTTCGAGCCCCTGC<br>gagcggatccTCATCTCCGCATGCCGGCGTGGA                |
| F3Δ2<br>(3285-3907)                       | pEGFP-C3   | XhoI/BamHI        | gagcCTCGAGGACGCACAGCTGTCCGAGGAACAGGGAC<br>gagcggatccTCATCTCCGCATGCCGGCGTGGA                 |
| F3Δ3<br>(3458-3907)                       | pEGFP-C3   | XhoI/BamHI        | gagcCTCGAGCGCATCCTGTACCAGAATCTGAACGAGCCT<br>gagcggatccTCATCTCCGCATGCCGGCGTGGA               |
| Inhibitory Region<br>(1882-2182)          | mCherry-C1 | Sall/BamHI        | gagcGTCGACAGCTTCCGGCAGAAGCAGGAAGCCAC<br>gagcggatccTCAGGCCTCCACGGCGCCGAAGTGCTTTCT            |
| Inhibitory Region<br>(1882-2182)          | pBD-Bam    | BamHI/Sall        | gagcggatccAGCTTCCGGCAGAAGCAGGAAGCCA<br>gagcgtcgacGGCCTCCACGGCGCCGAAGTGCTTTCT                |
| Promoting Region<br>(2762-3458)           | mCherry-C3 | XhoI/BamHI        | gagcCTCGAGAAAAAGGCCTGCATGTTTCGAGCCCCTGC<br>gagcggatccTCACCGCTCTCCCGTTTTCTCCCGTTC            |
| Promoting Region<br>(2762-3458)           | pBD-Bam    | BamHI/Sall        | gagcggatccAAAAAGGCCTGCATGTTTCGAGCCCCTG<br>gagcgtcgacCCGGCTCTCCCGTTTTCTCCCGTTC               |
| Fragment 3<br>(2691-3907)                 | pBD-Bam    | BamHI/Sall        | gagcggatcc CTCTCGAGGCCCTGAGAGCCGAGA<br>gagcgtcgac TCATCTCCGCATGCCGGCGTG                     |
| F2F3Δ1<br>(1882-3907)                     | pBD-Bam    | BamHI/Sall        | gagcggatcc AGCTTCCGGCAGAAGCAGGAAGCCAC<br>gagcgtcgac TCATCTCCGCATGCCGGCGTG                   |
| F3Δ1<br>(2762-3907)                       | pBD        | EcoRI/Sall        | gagc GAATTC AAAAAGGCCTGCATGTTTCGAGCCCCTGC<br>gagc GTCGAC TCATCTCCGCATGCCGGCGTGGA            |
| F3Δ2<br>(3285-3907)                       | pBD        | EcoRI/Sall        | gagc GAATTC GACGCACAGCTGTCCGAGGAACAGGGAC<br>gagc GTCGAC TCATCTCCGCATGCCGGCGTGGA             |
| F3Δ3<br>(3458-3907)                       | pBD        | EcoRI/Sall        | gagc GAATTC CGCATCCTGTACCAGAATCTGAACGAGCCT<br>gagc GTCGAC TCATCTCCGCATGCCGGCGTGGA           |
| Gene/Ref                                  | Vector     | Restriction sites | Primers: S/AS                                                                               |
| Cep170<br>TRANSOMIC<br>BC143762           | mCherry-C1 | Sall/SacII        | GAGCGTCGACATGAGCTTAACATCCTGGTTTTTGGTGAGC<br>GAGCCCGCGGTCAATTCTTGTACTGTAACATCTTCCTCTTCCC     |
| Cep170                                    | pEGFP-C1   | Sall/SacII        | re-cloned from mCherry-C1                                                                   |
| Cep170                                    | pAD        | NdeI/Sall         | ctcgagcatatg ATGAGCTTAACATCCTGGTTTTTGGTGAGC<br>tatatagtcgacTCATTCTTGTACTGTAACATCTTCCTCTTCCC |
| Cep170(1-852)                             | pAD        | NdeI/Sall         | ctcgagcatatg ATGAGCTTAACATCCTGGTTTTTGGTGAGC<br>tatatagtcgac TCAAAGTTCTATGGGTATGTTGGGCTGGG   |
| Cep170(1-1112)                            | pAD        | NdeI/Sall         | ctcgagcatatg ATGAGCTTAACATCCTGGTTTTTGGTGAGC<br>tatatagtcgac TCATGAAGCTTACCAAGTCGTGCTCTG     |
| Cdk5RAP2(Cep215)<br>TRANSOMIC<br>BC140794 | mCherry-C2 | EcoRI/Sall        | GAGCGAATTCATGATGGACTTGGTGTGGAAGAGGACGT<br>GAGCGTCGAC TCAGGAGCCTGGTCTGCTGGGA                 |
| Cdk5RAP2(Cep215)                          | pAD        | EcoRI/Sall        | re-cloned from mCherry-C2                                                                   |
| Cdk5RAP2(Cep215)                          | pBD-GAL4   | EcoRI/Sall        | re-cloned from mCherry-C2                                                                   |
| Cep68<br>NM 015147.2                      | mCherry-C2 | EcoRI/Sall        | GAGCGAATTC ATGGCCCTGGGTGAAGAAAAGGC<br>GAGCGTCGAC TTAACCCTTCACATGGGTGCTCC                    |
| Cep68                                     | pAD        | EcoRI/Sall        | re-cloned from mCherry-C2                                                                   |
| Cep68                                     | pMyc-C2    | EcoRI/Sall        | re-cloned from mCherry-C2                                                                   |

**Table S1.** A summary of cloning of AKAP350A-truncation mutants used in mapping of functional regions of AKAP350A and AKAP350A-binding proteins.

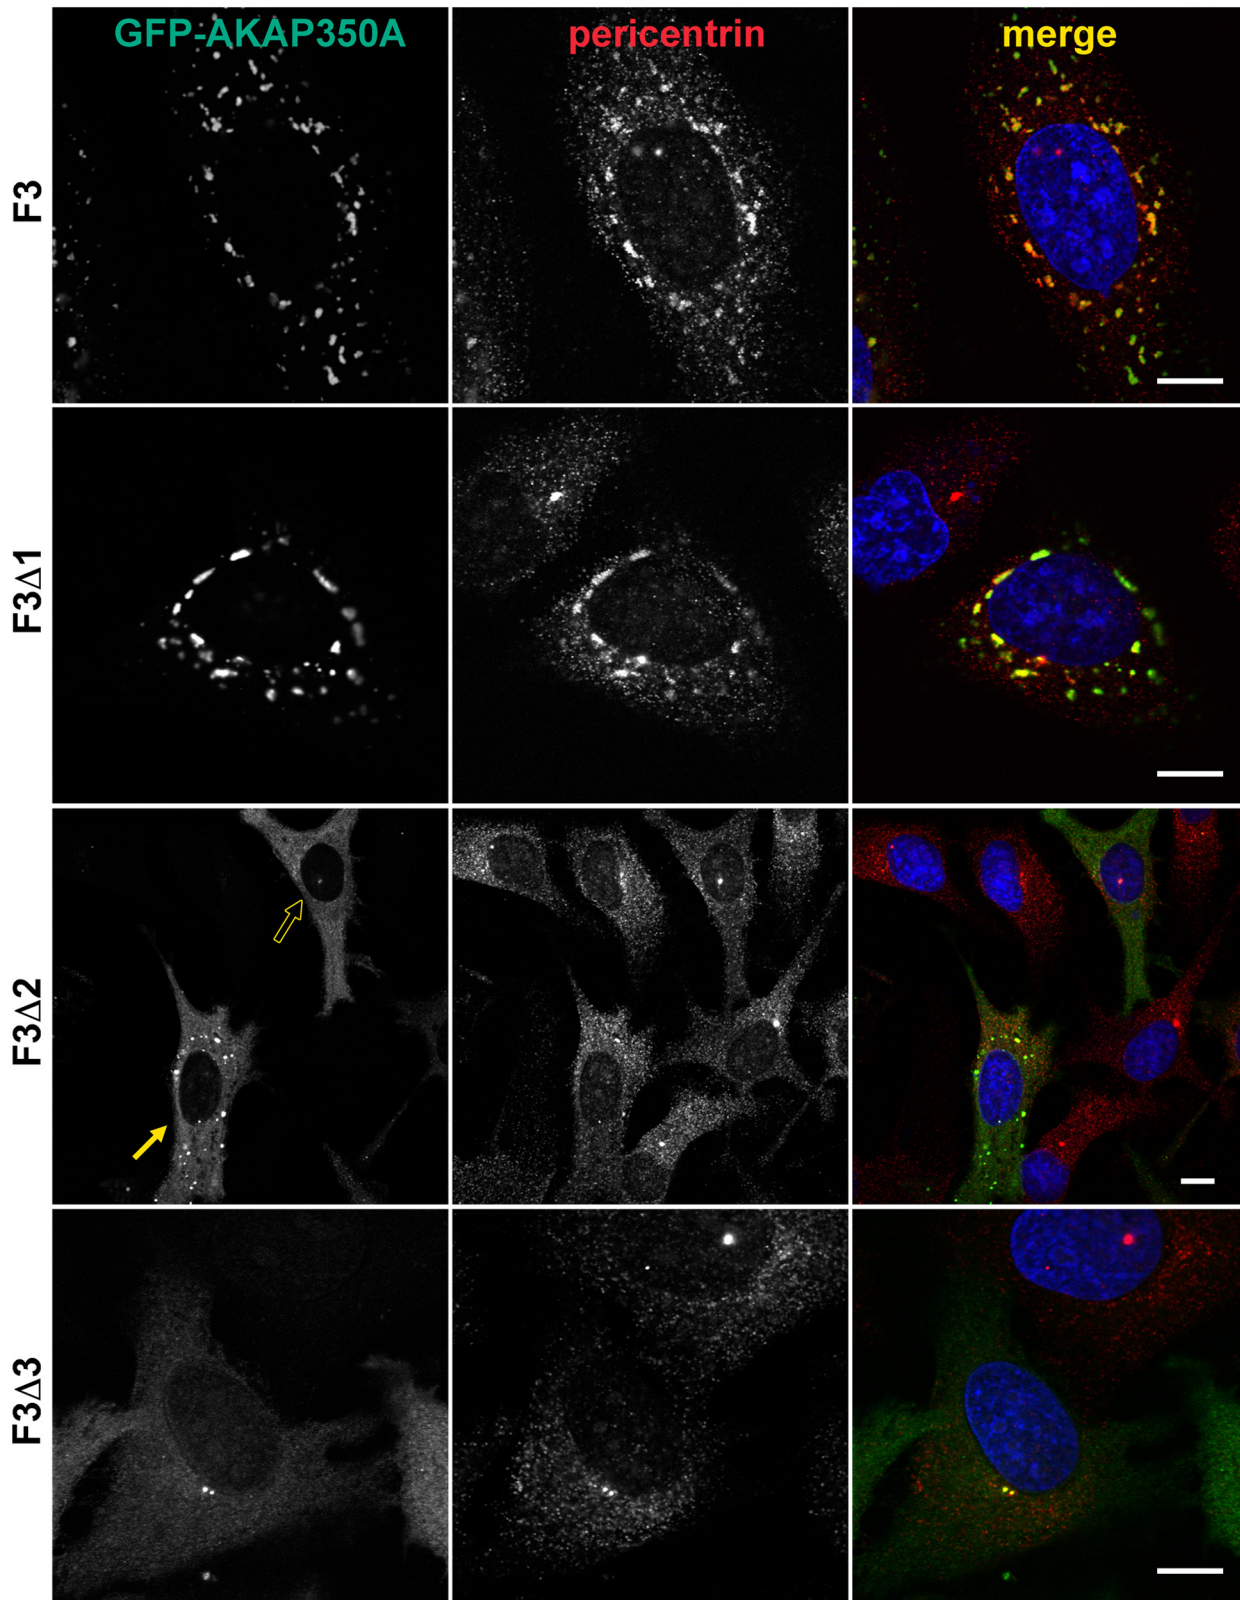

**Figure S1. Mapping of AKAP350A regions responsible for formation of supernumerary MTNCs (see schematic on Figure 8).** HeLa cells were transfected with truncations of synthetic EGFP-AKAP350A, fixed with cold methanol and stained for pericentrin (red). Note: lower magnification was used for F3 $\Delta$ 2 to include two transfected cells with different phenotypes (hollow arrow indicates single centrosome, and solid arrow indicates cell with numerous MTNCs). Bar = 10  $\mu$ m.

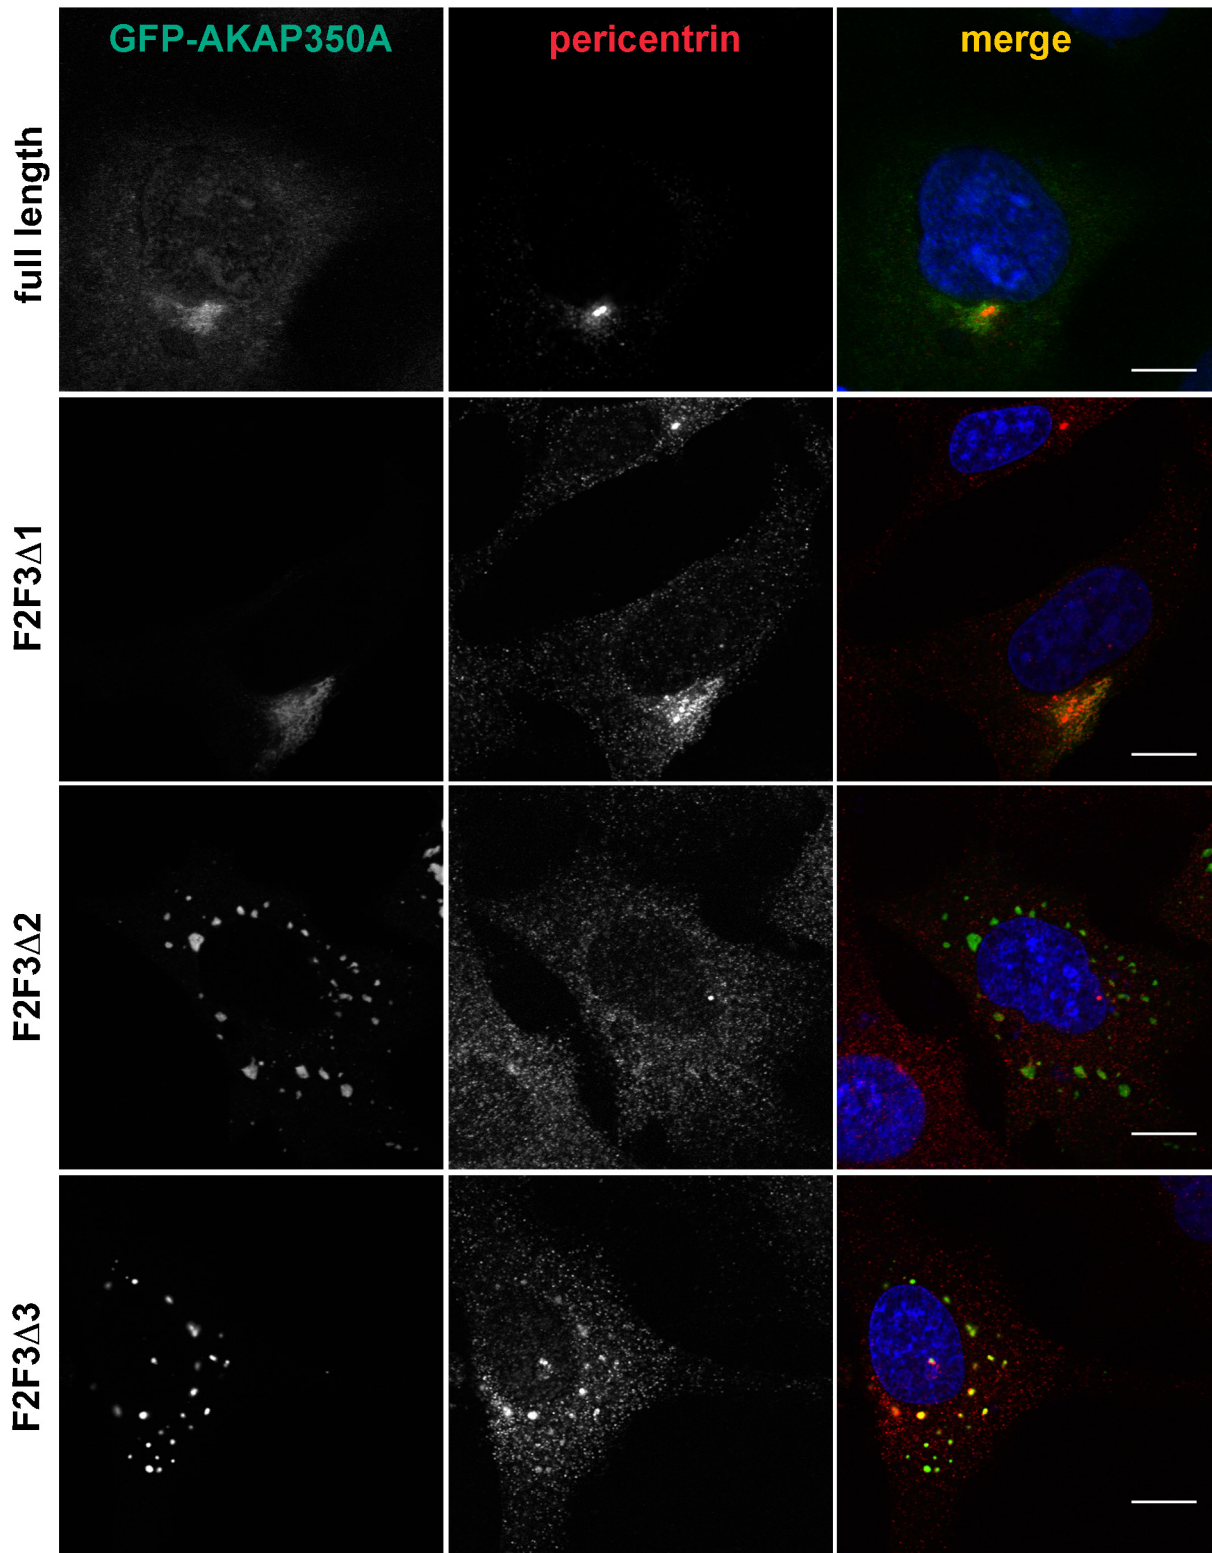

**Figure S2. Mapping of AKAP350A regions responsible for formation of supernumerary MTNCs (see schematic on Figure 8).** HeLa cells were transfected with full length synthetic AKAP350A or truncations of synthetic EGFP-AKAP350A as indicated at the left, fixed with cold methanol and stained for pericentrin (red). Bar = 10  $\mu$ m.

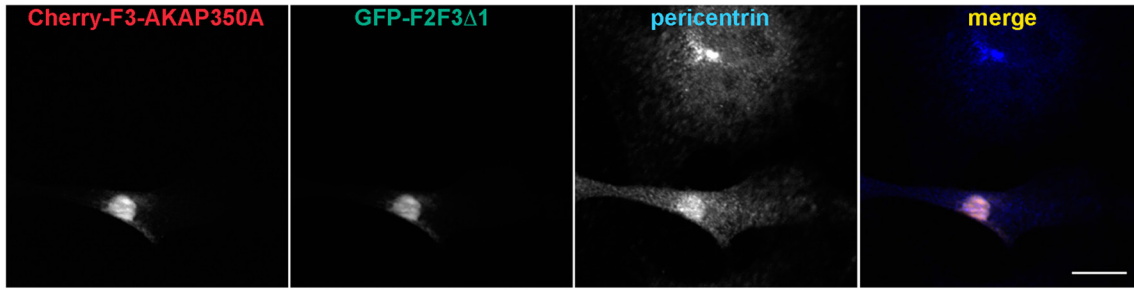

**Figure S3. Dual over-expression of EGFP-F2F3 $\Delta$ 1-AKAP350A with Cherry-F3-AKAP350A restores single centrosome phenotype and led to enlargement of PCM.** HeLa cells were fixed with methanol and stained for pericentrin (blue). Bar 10 =  $\mu$ m.



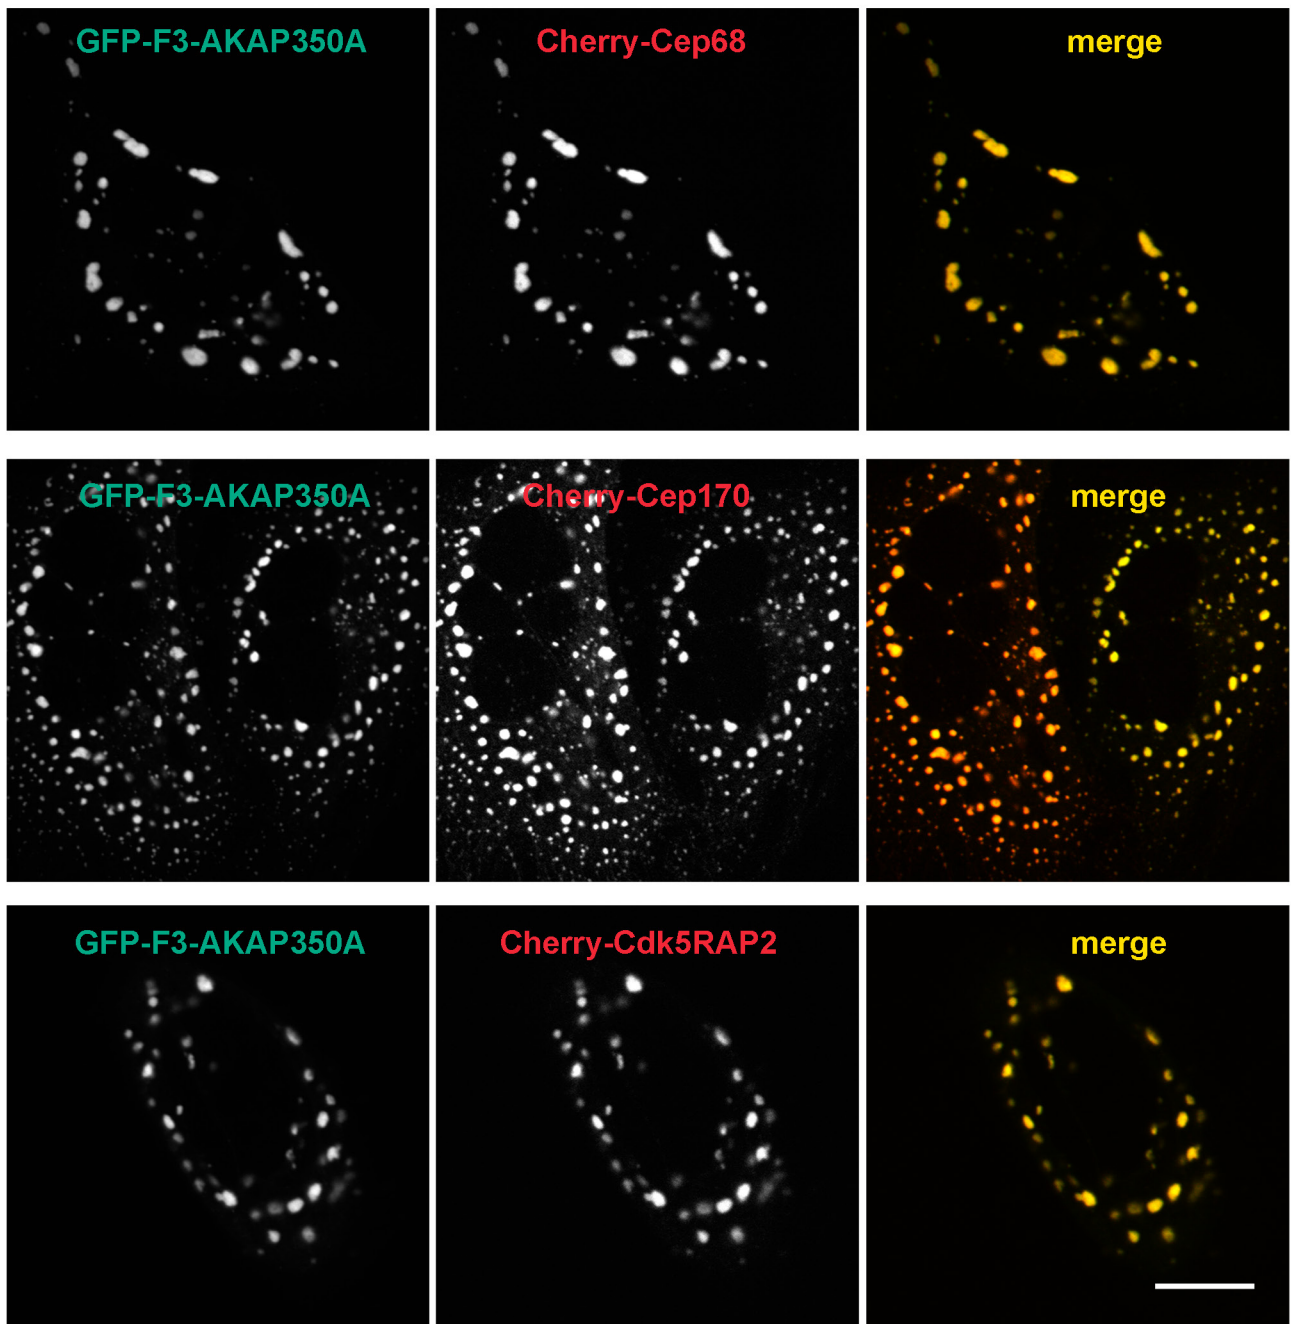

**Figure S4. mCherry-fused chimeras of Cdk5RAP2, Cep170 and Cep68 colocalized with over-expressed of EGFP-F3-AKAP350A on supernumerary MTNCs.** HeLa cells were fixed with methanol or with 4% PFA for Cdk5RAP2 staining, and immunostained for endogenous Cdk5RAP2, Cep170 or Cep68 (red). The degree of co-localization between EGFP-F3-AKAP350A (green) and mCherry-fused Cdk5RAP2/Cep170/Cep68 (red) were quantified using Pearson's Correlation Coefficient (PCC). PCCs were determined using JACOP plug-in of ImageJ software. PCC: Cep68:AKAP350  $0.98 \pm 0.02$ ; Cep170:AKAP350  $0.95 \pm 0.04$ ; Cdk5RAP:AKAP350  $0.97 \pm 0.03$ . Bar  $15 = \mu\text{m}$  (applies to all images).

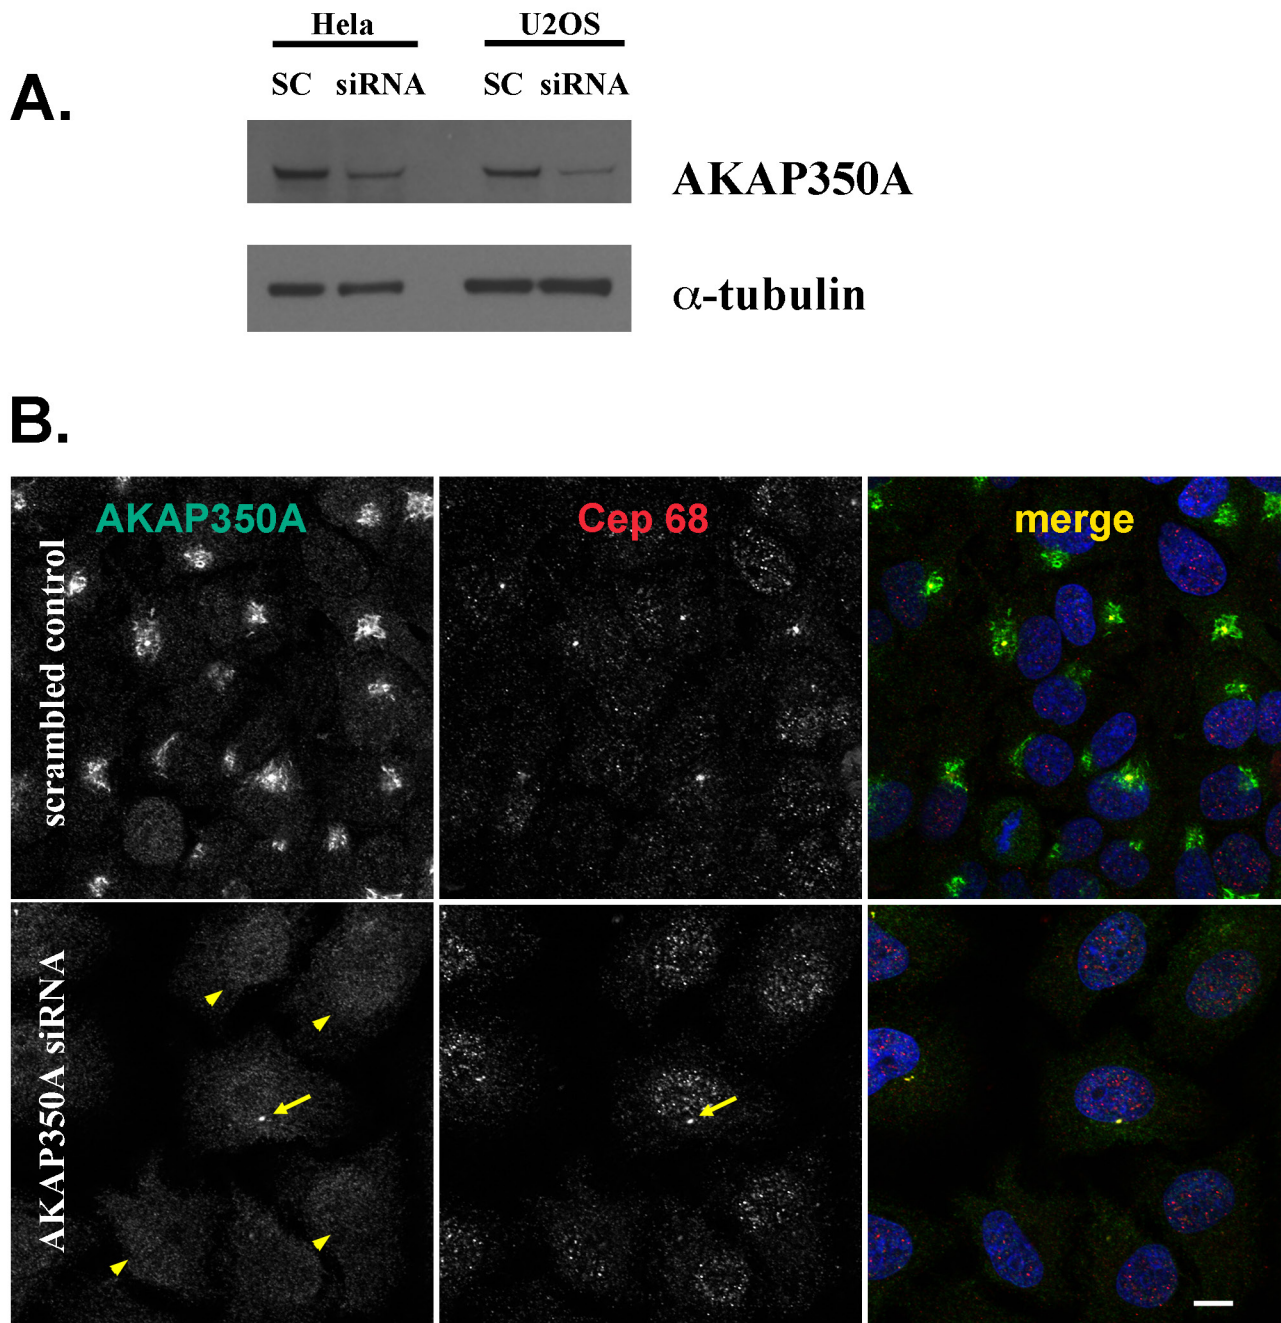

**Figure S5. Depletion of AKAP350A by siRNA interference.** A. Western blotting was performed for AKAP350A using 14G2 anti-AKAP350A monoclonal antibody and  $\alpha$ -tubulin as a loading control. Dual detection was performed on the same membrane for both AKAP350A and  $\alpha$ -tubulin using Odyssey Li-Cor system.

B. HeLa cells were transfected with either non-specific scrambled RNA duplexes or siRNA duplexes specific for AKAP350A, fixed and dual stained for AKAP350A (green in merged images) and Cep68 (red in merged images). Arrows indicate cells with AKAP350 at centrosome, co-localized with Cep68. Arrowheads indicate cells with displacement of both AKAP350A and Cep68. Bar = 10  $\mu$ m.

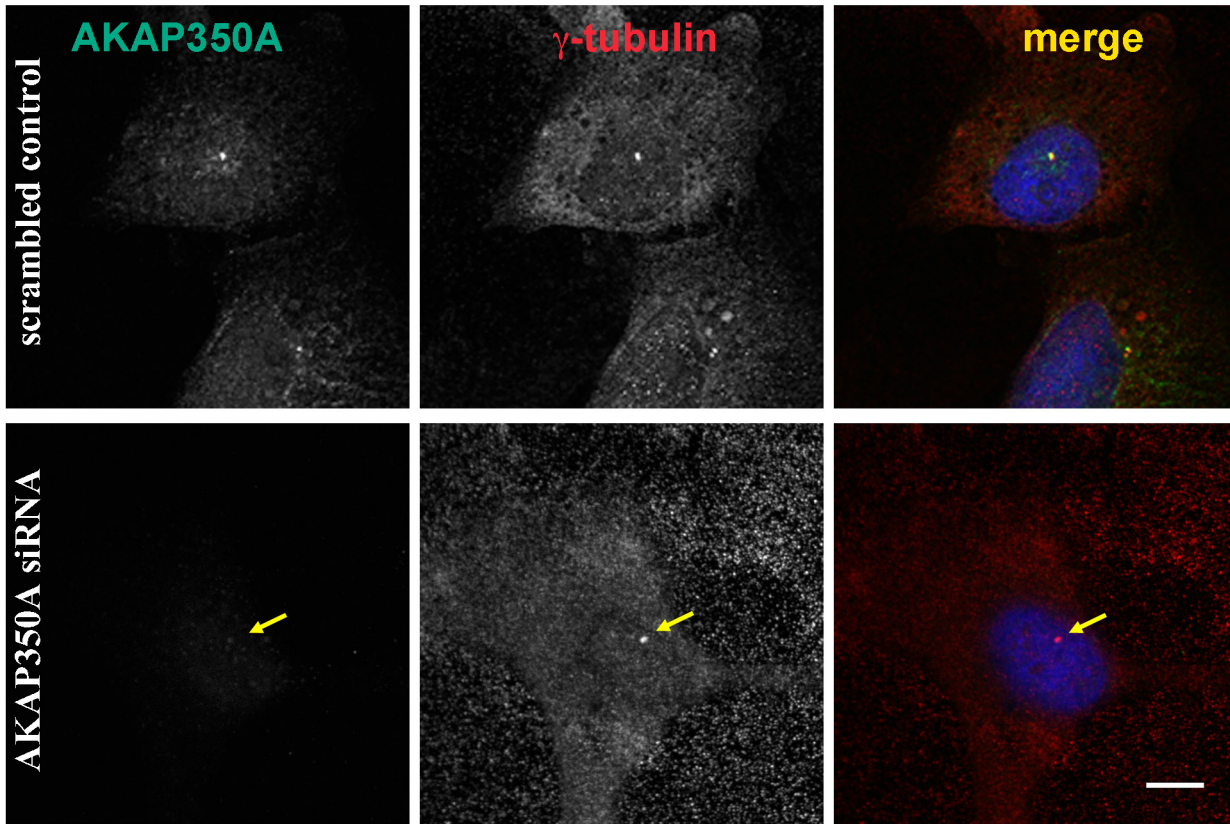

**Figure S6. Depletion of AKAP350A by siRNA interference.** U2OS cells were transfected with either non-specific scrambled RNA duplexes or siRNA duplexes specific for AKAP350A, fixed and dual stained for AKAP350A (green in merged images) and  $\gamma$ -tubulin (red in merged images). Arrows indicate cell depleted for AKAP350A, but still positive for  $\gamma$ -tubulin. Bar = 10  $\mu$ m.



**Fig.5video1. *De novo* formation of supernumerary MTNCs induced by over expression of EGFP-F3-AKAP350A.** Video was started 6 h following transfection and recorded for 80 minutes. Snapshots of video were taken every 10 min. Nikon Confocal Microscopy.

**Fig.5video2. Live imaging of GFP-F3-AKAP350A showing presence of multiple rings of supernumerary MTNCs.** Video was started 20h after transfection and recorded for 2h every 2 min. DeltaVision deconvolution microscopy.
